# Supplementary figures and images for: Insights into the electroactive impact of magnetic nanostructures in PVDF composites via small-angle neutron scattering
Source: Royal Society of Chemistry journal article supplement (doi:10.1039/d4nr03759f), 2025-01-01

### Supplementary Information

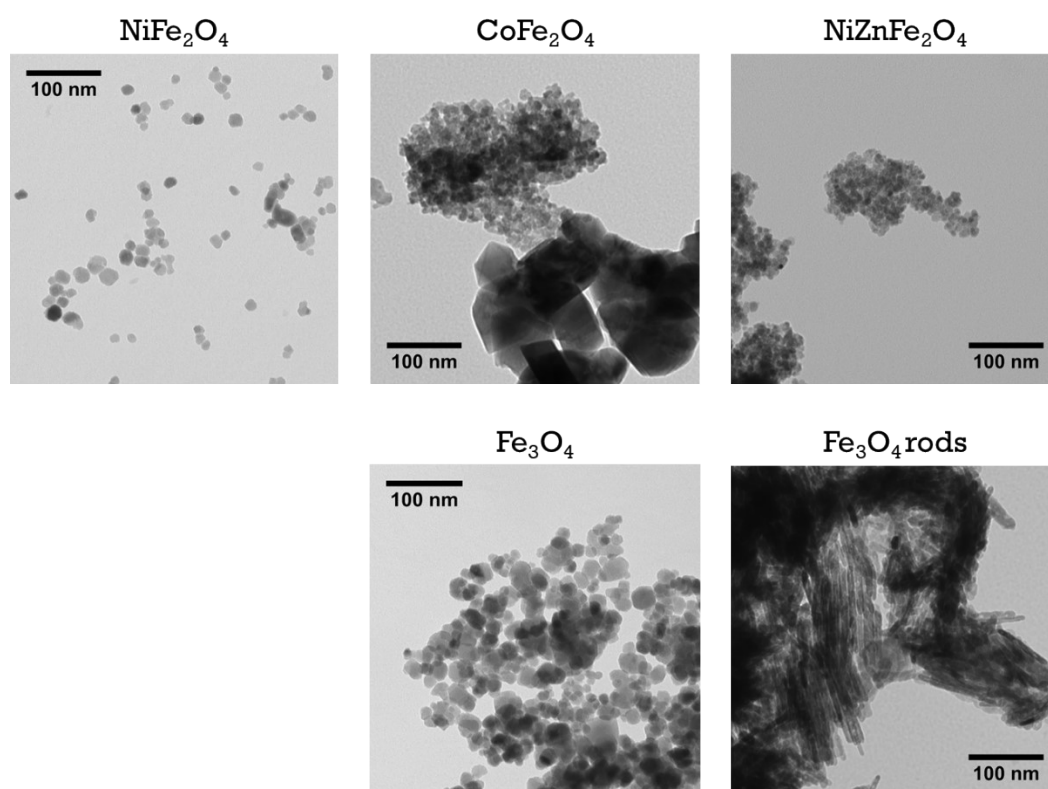

**Figure S1:** TEM images of the different magnetic nanoparticles.

Supplement: d4nr03759f1.pdf [file d4nr03759f1.pdf]
